# Supplementary material for: Multivariate Statistical and Multiproxy Constraints on Earthquake‐Triggered Sediment Remobilization Processes in the Central Japan Trench
Source: PubMed Central journal article supplement (PMC7379269; doi:10.1029/2019gc008861), 2020-06-18
Supplement: GGGE-21-e2019GC008861-s001.pdf [file GGGE-21-e2019GC008861-s001.pdf]

Supporting Information for

**[Multivariate statistical and multi-proxy constraints on earthquake-triggered sediment remobilization processes in the central Japan Trench]**

T. Schwestermann<sup>1</sup>, J. Huang<sup>1</sup>, J. Konzett<sup>2</sup>, A. Kioka<sup>1,3</sup>, G. Wefer<sup>4</sup>, K. Ikehara<sup>5</sup>, J. Moernaut<sup>1</sup>, T.I. Eglinton<sup>6</sup>, M. Strasser<sup>1,4</sup>

1. Institute of Geology, University of Innsbruck, Innrain 52, 6020 Innsbruck, Austria

2. Institute of Mineralogy and Petrography, University of Innsbruck, Innrain 52, 6020 Innsbruck, Austria

3. Department of Earth Resources Engineering, Kyushu University, Nishi-ku, Fukuoka 819-0395, Japan

4. MARUM – Center for Marine Environmental Sciences, University of Bremen, Leobener Str. 8, 28359 Bremen, Germany

5. Geological Survey of Japan, National Institute of Advanced Industrial Science and Technology (AIST), Tsukuba Central 7, 1-1-1 Higashi, Tsukuba 305-8567, Japan

6. Geological Institute, ETH Zürich, Sonneggstrasse 5, 8092 Zürich, Switzerland

**Contents of this file**

Figure S1

Figure S2

Table S1

Table S2

Table S3

## Introduction

The supporting information provides additional figures concerning the number of clusters used for our cluster analysis (Figure S1) and pie charts of all five heavy grain samples, respectively (Figure S2). Detailed information about sample depths for bulk grain size and heavy grain analysis is presented in table S1. Also, additional weighting models used for the erosion depth evaluation of the 3-ka age shift (Table S2) and the 6-ka age shift (Table S3) are presented.

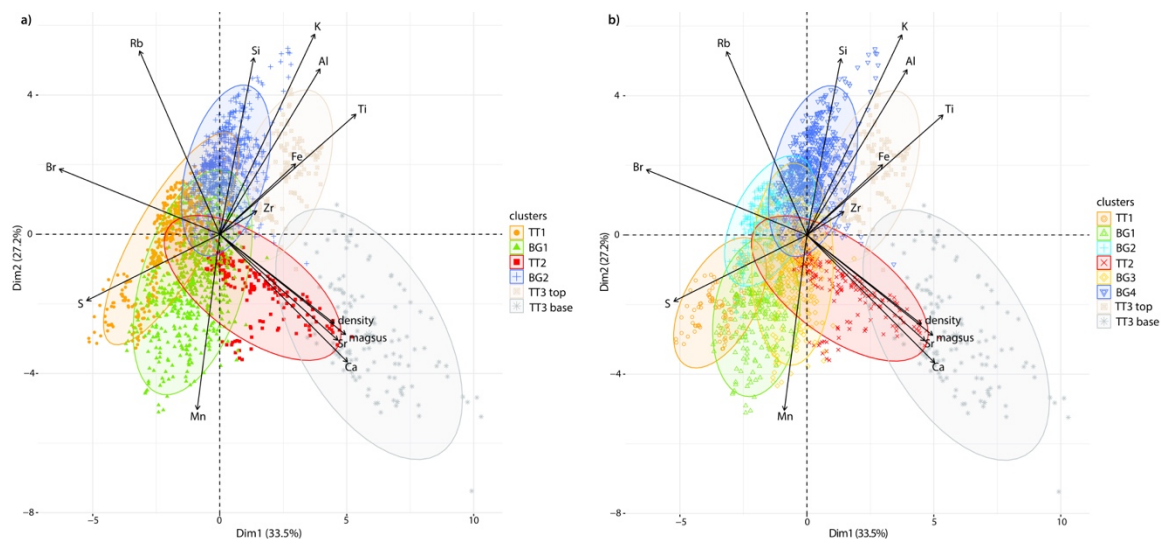

**Figure S1.** a) Biplot of 7 PCs with 6 clusters, b) biplot of 7 PCs with 8 clusters. The statistical patterns of event deposits do not change significantly from 6 to 8 clusters. In the 6-cluster model, the light blue cluster (BG2) is merged into the orange cluster (TT1), suggesting that the 6-cluster model is inadequate to fully reproduce the event-stratigraphic sequence. The 8-cluster model is splitting up the green cluster (BG1) in two sub-clusters, which does not add additional information for this study. Therefore, we conclude 7 clusters are the optimal cluster model (Fig. 4).

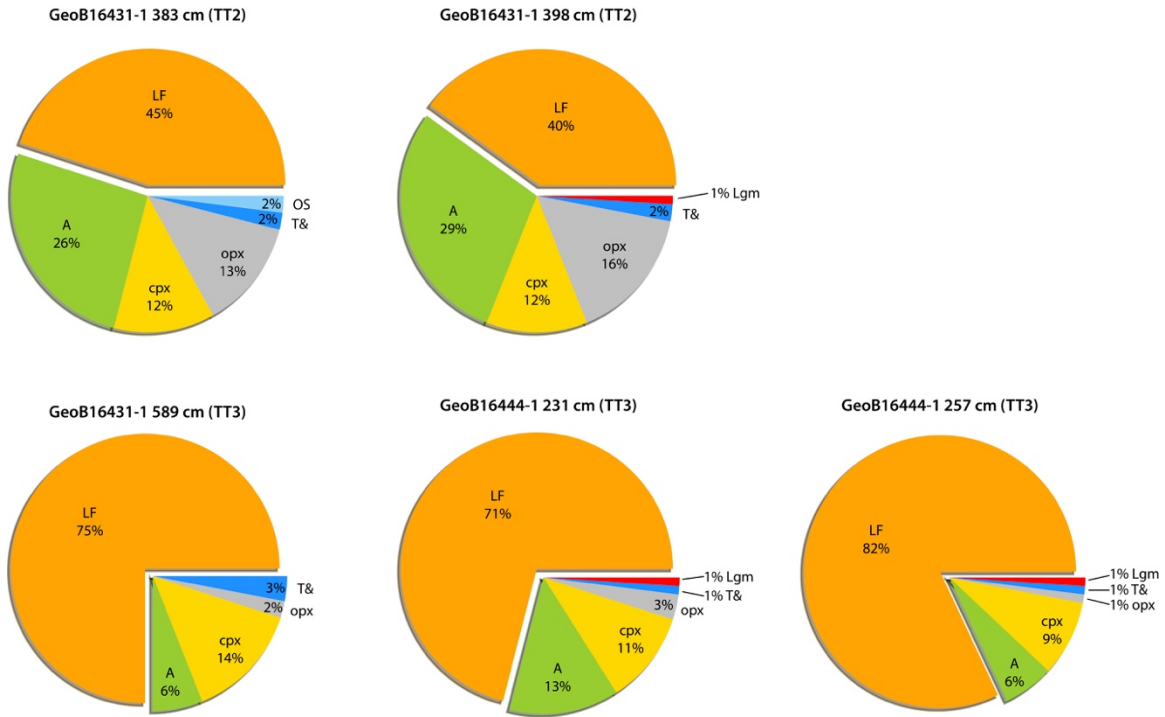

**Figure S2.** Pie charts of all five heavy grain analyses, respectively. The results show that internal variabilities of the studied turbidites are rather small.

**Table S1.** List of sample depths for bulk grain size and heavy grain analyses

| Core        | event | sample depth (cm) | bulk grain size | heavy grain |
|-------------|-------|-------------------|-----------------|-------------|
| GeoB16431-1 | TT2   | 374-375           | X               |             |
| GeoB16431-1 | TT2   | 383-384           | X               | X           |
| GeoB16431-1 | TT2   | 394-395           | X               |             |
| GeoB16431-1 | TT2   | 398-399           | X               | X           |
| GeoB16431-1 | TT2   | 402-403           | X               |             |
| GeoB16431-1 | TT2   | 407-408           | X               |             |
| GeoB16431-1 | TT3   | 590-581           | X               |             |
| GeoB16431-1 | TT3   | 589-590           | X               | X           |
| GeoB16431-1 | TT3   | 600-601           | X               |             |
| GeoB16431-1 | TT3   | 612-613           | X               |             |
| GeoB16444-1 | TT3   | 224-225           | X               |             |
| GeoB16444-1 | TT3   | 231-232           | X               | X           |
| GeoB16444-1 | TT3   | 235-236           | X               |             |
| GeoB16444-1 | TT3   | 257-258           | X               | X           |

**Table S2.** Remobilization model for a 3 ka age shift ( $A_{av} \sim 57.4$ ) with linear weighting (TOC content) of a) 1.5 to 1.0 wt% and b) 2.0 to 0.2 wt%.

| Theoretical stratigraphy | a) TOC [wt%] | a) Linear bulk age ( $t_i$ ) [a BP] | a) $A_i$ (of $^{14}C$ ) | b) TOC [wt%] | b) Linear bulk age ( $t_i$ ) [a BP] | b) $A_i$ (of $^{14}C$ ) |
|--------------------------|--------------|-------------------------------------|-------------------------|--------------|-------------------------------------|-------------------------|
| $t_1$                    | 1.50         | 1600                                | 82.40                   | 2.00         | 1600                                | 82.40                   |
| $t_2$                    | 1.45         | 2320                                | 75.53                   | 1.82         | 2620                                | 72.84                   |
| $t_3$                    | 1.40         | 3040                                | 69.23                   | 1.64         | 3640                                | 64.38                   |
| $t_4$                    | 1.35         | 3760                                | 63.45                   | 1.46         | 4660                                | 56.91                   |
| $t_5$                    | 1.30         | 4480                                | 58.16                   | 1.28         | 5680                                | 50.30                   |
| $t_6$                    | 1.25         | 5200                                | 53.31                   | 1.10         | 6700                                | 44.46                   |
| $t_7$                    | 1.20         | 5920                                | 48.86                   | 0.92         | 7720                                | 39.30                   |
| $t_8$                    | 1.15         | 6640                                | 44.79                   | 0.74         | 8740                                | 34.74                   |
| $t_9$                    | 1.10         | 7360                                | 41.05                   | 0.56         | 9760                                | 30.71                   |
| $t_{10}$                 | 1.05         | 8080                                | 37.63                   | 0.38         | 10780                               | 27.14                   |
| $t_{11} (= z)$           | 1.00         | 8800                                | 34.49                   | 0.20         | 11800                               | 23.99                   |
| weighted average         |              |                                     | <b>57.25</b>            |              |                                     | <b>57.32</b>            |

**Table S3.** Remobilization model for a 6 ka age shift ( $A_{av} \sim 39.9$ ) with linear weighting (TOC content) of a) 1.5 to 1.0 wt% and b) 2.0 to 0.2 wt%.

| Theoretical stratigraphy | a) TOC [wt%] | a) Linear bulk age ( $t_i$ ) [a BP] | a) $A_i$ (of $^{14}C$ ) | b) TOC [wt%] | b) Linear bulk age ( $t_i$ ) [a BP] | b) $A_i$ (of $^{14}C$ ) |
|--------------------------|--------------|-------------------------------------|-------------------------|--------------|-------------------------------------|-------------------------|
| $t_1$                    | 1.50         | 1600                                | 82.40                   | 2.00         | 1600                                | 82.40                   |
| $t_2$                    | 1.45         | 3220                                | 67.74                   | 1.82         | 4040                                | 61.34                   |
| $t_3$                    | 1.40         | 4840                                | 55.68                   | 1.64         | 6480                                | 45.66                   |
| $t_4$                    | 1.35         | 6460                                | 45.77                   | 1.46         | 8920                                | 33.99                   |
| $t_5$                    | 1.30         | 8080                                | 37.63                   | 1.28         | 11360                               | 25.30                   |
| $t_6$                    | 1.25         | 9700                                | 30.93                   | 1.10         | 13800                               | 18.84                   |
| $t_7$                    | 1.20         | 11320                               | 25.43                   | 0.92         | 16240                               | 14.02                   |
| $t_8$                    | 1.15         | 12940                               | 20.90                   | 0.74         | 18680                               | 10.44                   |
| $t_9$                    | 1.10         | 14560                               | 17.18                   | 0.56         | 21120                               | 7.77                    |
| $t_{10}$                 | 1.05         | 16180                               | 14.12                   | 0.38         | 23560                               | 5.78                    |
| $t_{11} (= z)$           | 1.00         | 17800                               | 11.61                   | 0.20         | 26000                               | 4.31                    |
| weighted average         |              |                                     | <b>39.93</b>            |              |                                     | <b>39.84</b>            |
